# Supplementary material for: MOF-derived magnetic Co@porous carbon as a direction-controlled micromotor for drug delivery
Source: Royal Society of Chemistry journal article supplement (doi:10.1039/d0nj04957c), 2020-01-01
Supplement: d0nj04957c1.pdf [file d0nj04957c1.pdf]

## MOFs-Derived Magnetic Co@Porous Carbon as Direction-Controlled Micromotors for Drug Delivery

Hongli Zhu, Jing Huang, Huijun Chen, and Xiaomiao Feng\*

Key Laboratory for Organic Electronics and Information Displays & Institute of Advanced Materials (IAM), Jiangsu National Synergistic Innovation Center for Advanced Materials (SICAM), Nanjing University of Posts & Telecommunications, 9 Wenyuan Road, Nanjing 210023, China.

iamxmfeng@njupt.edu.cn

E-mail:

**Video S1** Self-propelled movement of Co@PCs ( annealing at 500 °C, 600 °C, 700 °C, 800 °C, respectively) in 7% H<sub>2</sub>O<sub>2</sub> and 0.33% Triton X-100.

**Video S2** Self-propelled movement of Co@PCs (annealing at 600 °C) in different concentration of H<sub>2</sub>O<sub>2</sub> (1%-10% ) and 0.33% Triton X-100.

**Video S3** Direction control of Co@PCs.

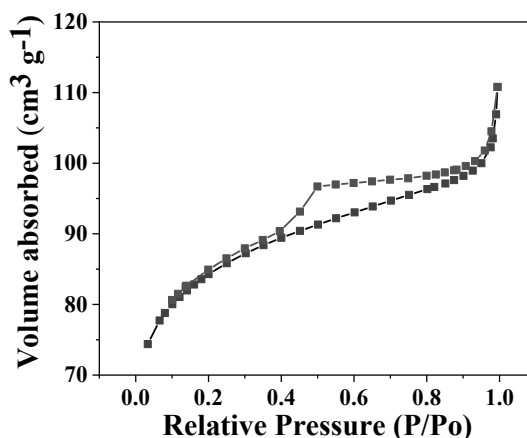

Fig. S1 N<sub>2</sub> adsorption/desorption isotherms of Co@PCs-600

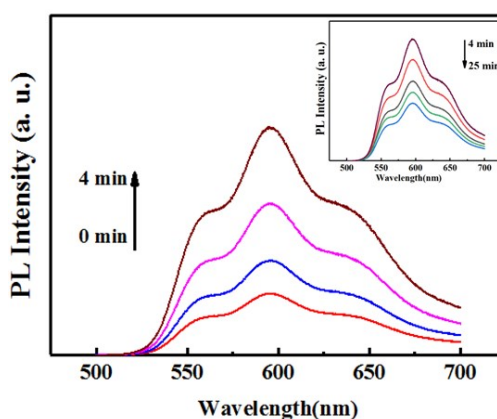

Fig. S2 Emission spectra of Co@PCs-600/DOX in 5% H<sub>2</sub>O<sub>2</sub> solution at different time vary from 0 to 4 min (0, 1, 2 and 4 min) and 4 to 25 min (4, 10, 15, 20, and 25min) (insert).
